# Supplementary material
Source: publisher figshare collection journal article supplement (https://tandf.figshare.com/articles/dataset/_/19614241)
Supplement: Supplementary file 2 [file 1]

**Table 2- Supplementary Material**

*Consolidated criteria for reporting qualitative studies (COREQ): 32-item checklist*

| No Item                                        | Guide questions/ description                                                                                                                          |
|------------------------------------------------|-------------------------------------------------------------------------------------------------------------------------------------------------------|
| <b>Domain 1: Research team and reflexivity</b> |                                                                                                                                                       |
| Personal characteristics                       |                                                                                                                                                       |
| 1. Interviewer/ facilitator                    | N/A-survey research                                                                                                                                   |
| 2. Credentials                                 | N/A                                                                                                                                                   |
| 3. Occupation                                  | N/A                                                                                                                                                   |
| 4. Gender                                      | N/A                                                                                                                                                   |
| 5. Experience and training                     | N/A                                                                                                                                                   |
| Relationship with participants                 |                                                                                                                                                       |
| 6. Relationship established                    | N/A                                                                                                                                                   |
| 7. Participant knowledge of the interviewer    | See limitations.                                                                                                                                      |
| 8. Interviewer characteristics                 | N/A                                                                                                                                                   |
| <b>Domain 2: study design</b>                  |                                                                                                                                                       |
| Theoretical framework                          |                                                                                                                                                       |
| 9. Methodological orientation and Theory       | Phenomenology                                                                                                                                         |
| Participant selection                          |                                                                                                                                                       |
| 10. Sampling                                   | Purposive                                                                                                                                             |
| 11. Method of approach                         | Email                                                                                                                                                 |
| 12. Sample size                                | 52 participants                                                                                                                                       |
| 13. non-participation                          | N/A                                                                                                                                                   |
| Setting                                        |                                                                                                                                                       |
| 14. Setting of data collection                 | Recruitment via email.                                                                                                                                |
| 15. Presence of non-participants               | N/A                                                                                                                                                   |
| 16. Description of sample                      | 47 students and 5 facilitators                                                                                                                        |
| Data collection                                |                                                                                                                                                       |
| 17. Interview guide                            | A researcher designed survey was used to elicit perspectives from speech and language therapy students and facilitators based on 11-step PBL process. |
| 18. Repeat interviews                          | N/A                                                                                                                                                   |

|                                        |                                                                                     |
|----------------------------------------|-------------------------------------------------------------------------------------|
| 19. Audio/visual recording             | N/A                                                                                 |
| 20. Field notes                        | N/A                                                                                 |
| 21. Duration                           | N/A                                                                                 |
| 22. Data saturation                    | N/A                                                                                 |
| 23. Transcripts returned               | N/A                                                                                 |
| <b>Domain 3: analysis and findings</b> |                                                                                     |
| Data analysis                          |                                                                                     |
| 24. Number of data coders              | Two                                                                                 |
| 25. Description of the coding tree     | Yes                                                                                 |
| 26. Derivation of themes               | Derived from the data                                                               |
| 27. Software                           | XMind software, SPSS                                                                |
| 28. Participant checking               | N/A                                                                                 |
| Reporting                              |                                                                                     |
| 29. Quotations presented               | Participant quotes used to illustrate themes and identified with participant number |
| 30. Data and findings consistent       | Consistency between data and findings achieved.                                     |
| 31. Clarity of major themes            | Major themes clearly presented                                                      |
| 32. Clarity of minor themes            | Minor themes clearly presented.                                                     |
