# Supplementary material
Source: publisher figshare collection journal article supplement (https://tandf.figshare.com/articles/dataset/_/19614241)
Supplement: Supplementary file 3 [file 1]

**Table 1- Supplementary Material**

***11-Step PBL Process***

|    |                                                                                                      |
|----|------------------------------------------------------------------------------------------------------|
|    | <b>PBL sessions are structured as follows</b>                                                        |
| 1  | Assignment of roles, in which a chairperson and secretary are elected by learners.                   |
| 2  | Analysing the problem by defining its content                                                        |
| 3  | Remembering and discussing what is already known, either formally, informally, or both,              |
| 4  | Making hypotheses and imagining implications                                                         |
| 5  | Structuring questions as learning issues and ranking their relative importance,                      |
| 6  | Distributing academic work in which learners decide on who will research what                        |
| 7  | Doing the work of resolving learning issues by assessing literature                                  |
| 8  | Reconvening, sharing and synthesizing knowledge in note form                                         |
| 9  | Clarifying knowledge by constructing concept maps or devising products related to the problem        |
| 10 | Re-reading the problem in the light of newfound knowledge and relating this to the curriculum matrix |
| 11 | Reflecting, giving feedback and making suggestions for the future.                                   |

(Fourie, 2008).
